# Supplementary material for: Trichloroethylene sensing in water based on SERS with multifunctional Au/TiO2 core–shell nanocomposites
Source: Royal Society of Chemistry journal article supplement (doi:10.1039/c5an01294e), 2015-01-01
Supplement: c5an01294e1.pdf [file c5an01294e1.pdf]

Supplementary Information for  
**Trichloroethylene sensing in water based on SERS with  
multifunctional Au/TiO<sub>2</sub> core-shell nanocomposites**

*Wen Ren, Zhongwu Zhou and Joseph M. K. Irudayaraj\**

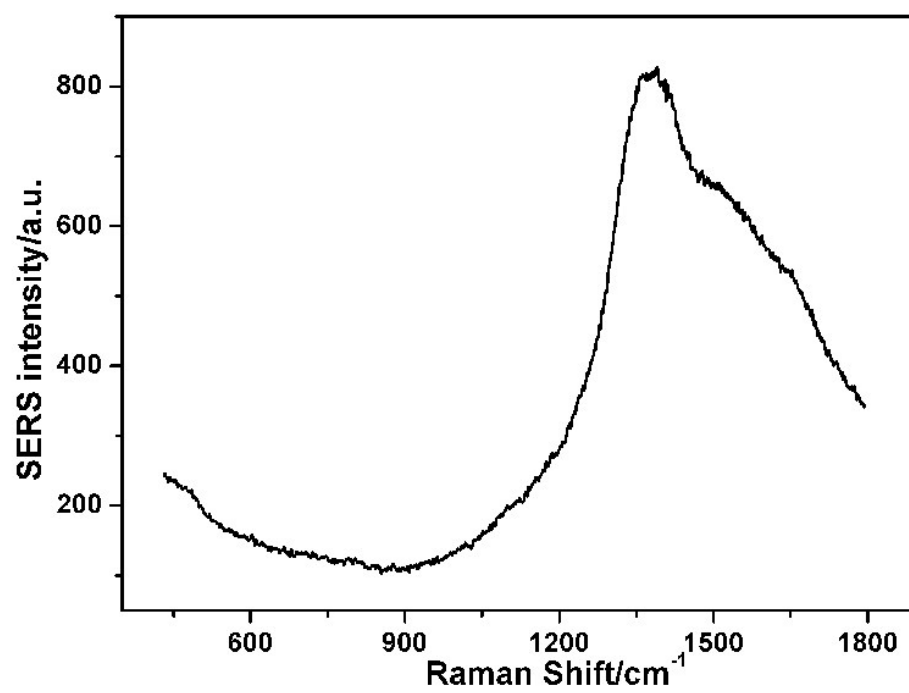

Fig. S1 Average background spectra of glass container used for SERS measurement.

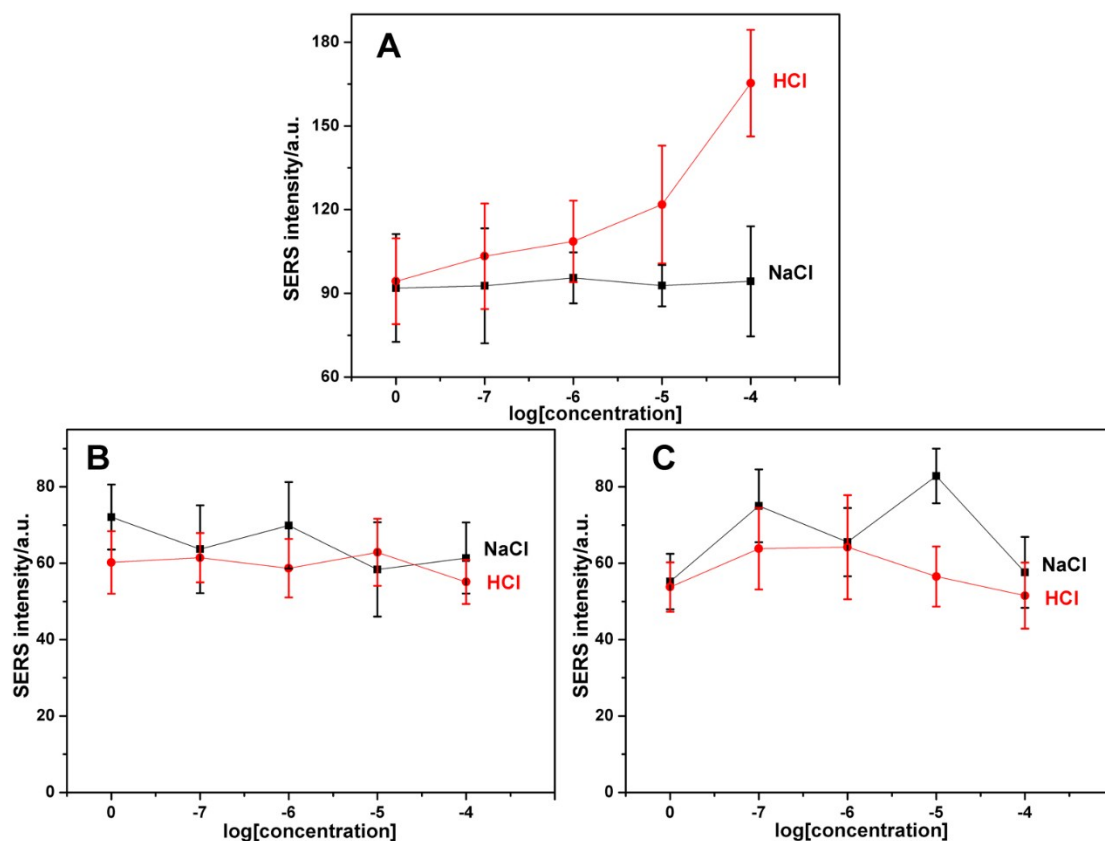

Fig. S2 SERS intensity of the peak at  $1095\text{ cm}^{-1}$  [mean  $\pm$  SD,  $n = 3$ ] from GNPs modified with 4-MPy after 90 min of addition of serial concentrations of HCl or NaCl (A), and SERS intensity of the peak at  $1095\text{ cm}^{-1}$  [mean  $\pm$  SD,  $n = 3$ ] from Au/TiO<sub>2</sub> core-shell nanocomposites after 90 min (B) and 24 h (C) of addition of serial concentrations of HCl or NaCl. The results from GNPs modified with 4-MPy show that hydriions will increase the SERS intensity while chloridions less than  $10^{-4}\text{ M}$  will not significantly influence the SERS intensity. Meanwhile the results from the samples of Au/TiO<sub>2</sub> core-shell nanocomposites with added HCl exhibit that the added HCl will not affect the SERS of the nanocomposites, suggesting that only the HCl generated in the TiO<sub>2</sub> shell will improve the SERS intensity.

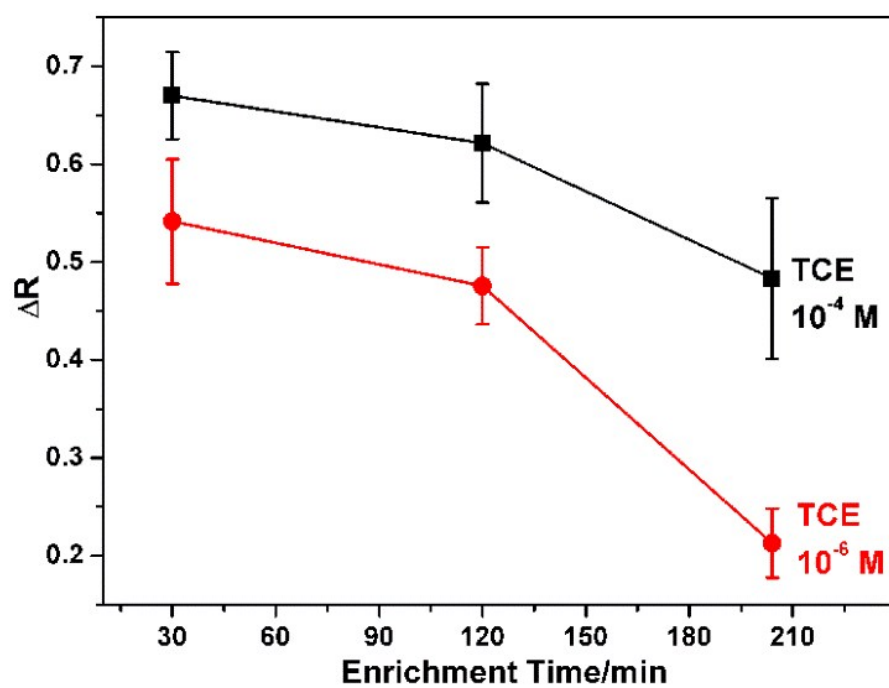

Fig. S3. SERS intensity change of the peak at  $1095\text{ cm}^{-1}$  [mean  $\pm$  SD,  $n = 3$ ] in the samples with  $10^{-4}$  and  $10^{-6}$  M of TCE for different duration of enrichment.

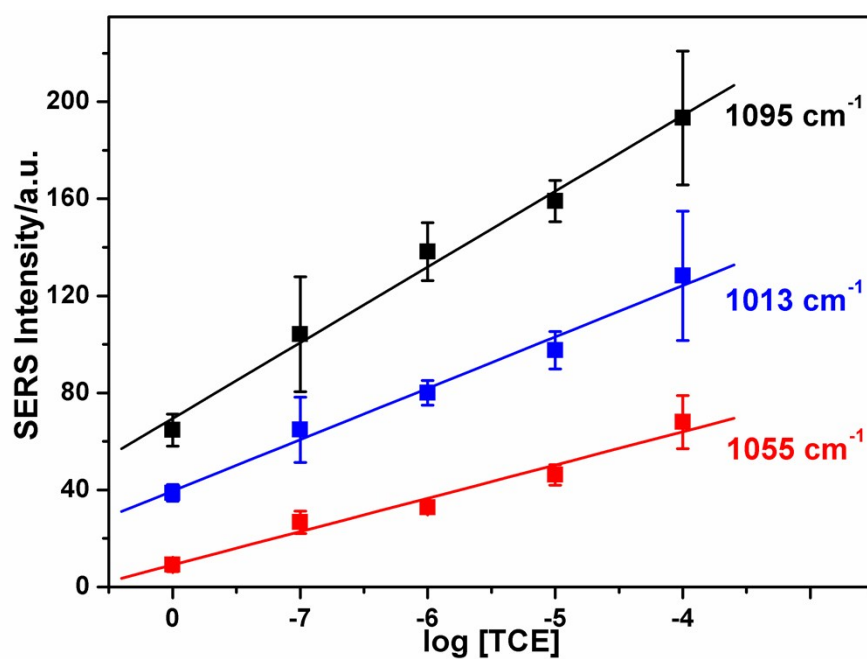

Fig. S4 Calibration plot in response to serial concentration TCE based on SERS intensity of the peak at 1095, 1055 and 1013  $\text{cm}^{-1}$ .

Table S1. LOD and  $R^2$  based on the peaks at 1095, 1055 and 1013  $\text{cm}^{-1}$

| Peak position         | LOD/ $\mu\text{M}$ | LOD/ppb | $R^2$ |
|-----------------------|--------------------|---------|-------|
| 1095 $\text{cm}^{-1}$ | 0.038              | 5.0     | 0.993 |
| 1055 $\text{cm}^{-1}$ | 0.068              | 8.9     | 0.968 |
| 1013 $\text{cm}^{-1}$ | 0.060              | 7.9     | 0.985 |

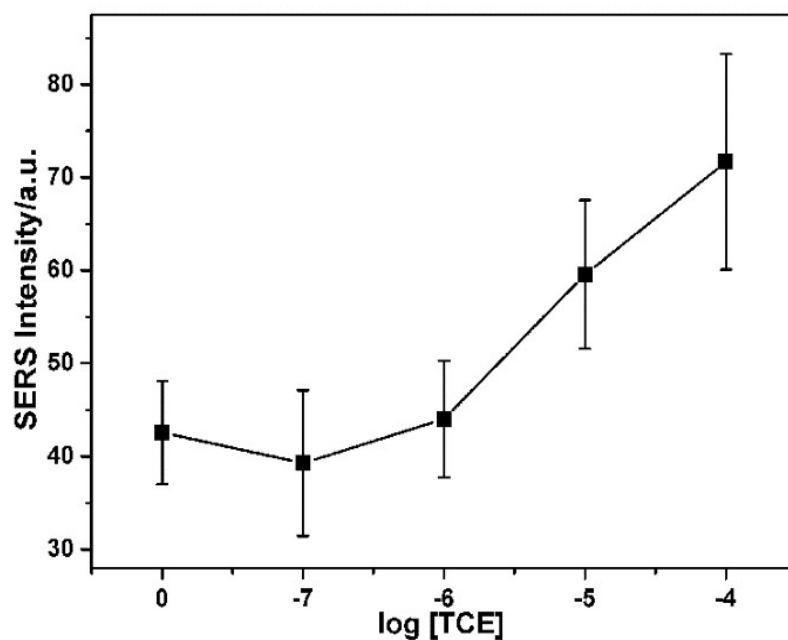

Fig. S5. SERS intensity of the peak at  $1095\text{ cm}^{-1}$  [mean  $\pm$  SD,  $n = 3$ ] from unpurified water samples from river purposefully contaminated with TCE. The dust and other suspended solid in unpurified river water are believed to influence the TCE absorption of the  $\text{TiO}_2$  shell and thus the detection of TCE less than  $10^{-6}\text{ M}$ .

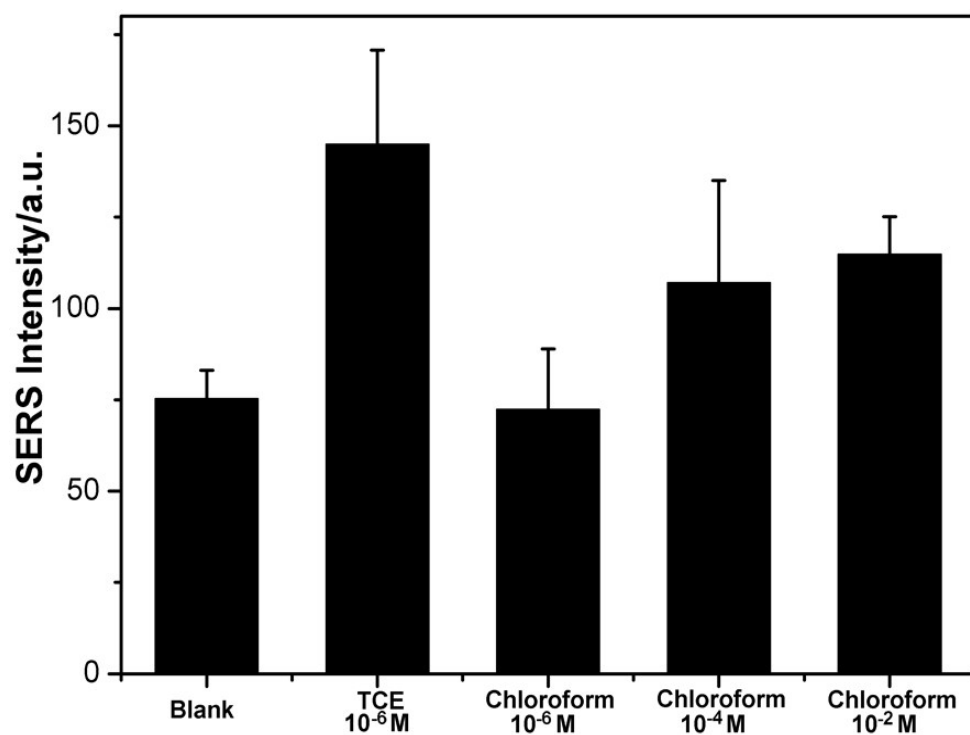

Fig. S6. SERS intensity of the peak at 1095 cm<sup>-1</sup> [mean ± SD, n = 3] from blank and the samples with 10<sup>-6</sup> M TCE, 10<sup>-6</sup>, 10<sup>-4</sup>, 10<sup>-2</sup> M chloroform.
